# Supplementary material for: Mammalian nuclear TRUB1, mitochondrial TRUB2, and cytoplasmic PUS10 produce conserved pseudouridine 55 in different sets of tRNA
Source: PubMed Central journal article supplement — RNA. 2021 Jan;27(1):66–79. doi: 10.1261/rna.076810.120 (PMC7749629; doi:10.1261/rna.076810.120), 2021-01
Supplement: supp_076810.120_Supplemental_Material.pdf [file supp_076810.120_Supplemental_Material.pdf]

## Supplemental Material

### **Mammalian nuclear TRUB1, mitochondrial TRUB2 and cytoplasmic PUS10 produce conserved pseudouridine 55 in different sets of tRNA**

Shaoni Mukhopadhyay, Manisha Deogharia and Ramesh Gupta

#### **METHODS**

#### **PUS1, PUS2 and tRNA<sup>Phe</sup> synthase activities for use as controls for the tRNA<sup>Phe</sup> synthase activities in the extracts of TRUB1, TRUB2 and PUS10 knockdown strains**

Although TRUB1 and TRUB2 are located in the nucleus and mitochondria, respectively (Rintala-Dempsey and Kothe 2017), both can produce  $\Psi$ 27 in tRNAs. To determine this activity, we treated [ $\alpha$ -<sup>32</sup>P]UTP-labeled tRNA<sup>Phe</sup> with the extracts and quantitated the amount of labeled  $\Psi$ p after RNase T2 digestion of the product, separation by 2D-TLC and phosphorimaging. In these digests, a labeled modified or unmodified U would be derived from the first of the two consecutive U's present in the tRNA. Human tRNA<sup>Phe</sup> contains UU sequences at three positions: 16-17, 27-28 and 54-55 (Supplemental Fig. S1). Dihydrouridine (D),  $\Psi$  and T are present at positions 16, 27 and 54 respectively, in the native human tRNA<sup>Phe</sup> (Juhling et al. 2009). Dp sometimes merges with and is indistinguishable from Up in the TLC separations. Generally, Tp is not produced due to the lack of methyl-donor SAM in the extracts. Previously, by treating the U27A mutant of tRNA<sup>Phe</sup> with total cell extracts, we confirmed that the  $\Psi$  from [ $\alpha$ -<sup>32</sup>P]UTP-labeled tRNA<sup>Phe</sup> is derived from U27 (Deogharia et al. 2019). No  $\Psi$  was produced in that case. In the experiments here, we observe labeled  $\Psi$ p only with the nuclear and mitochondrial extracts, which would be the products of  $\Psi$ 27-synthase activities of PUS1 and PUS2, respectively (Supplemental Fig. S2A). Although, human cytoplasmic PUS10 can convert U54 to a  $\Psi$  in

certain tRNAs, this is not the case here, because it does not produce  $\Psi$ 54 in tRNA<sup>Phe</sup> (Deogharia et al. 2019). This is again confirmed here by the lack of  $\Psi$  after treatment with cytoplasmic extract (Supplemental Fig. S2A, panel at the bottom). The  $\Psi$ 27 synthase activities of both PUS1 and PUS2 remain nearly the same in the nuclear and mitochondrial extracts of the knockdown strains when compared with their activities with the extracts of the wild type (Supplemental Fig. S2A). Therefore,  $\Psi$ 55 synthase activities in the nuclear and mitochondrial extracts of the knockdown strains are measured relative to their  $\Psi$ 27 synthase activities as shown in Fig. 2C.

So far, tRNA<sup>Met</sup> is the only known cytoplasmic tRNA of eukaryotes that contains  $\Psi$ 31 (Juhling et al. 2009). Pus6 is reported to produce  $\Psi$ 31 in the cytoplasmic and mitochondrial tRNAs of yeast and it is not present in the nucleus (Ansmant et al. 2001). PUSD1 is suggested to do the same modification in human tRNAs (Spenkuch et al. 2014). Therefore, we used tRNA  $\Psi$ 31 synthase activity as a control for cytoplasmic extracts of the knockdown strains. Since U31 of tRNA<sup>Met</sup> is followed by a C32, we used [ $\alpha$ -<sup>32</sup>P]CTP-labeled tRNA<sup>Met</sup> to determine the  $\Psi$ 31 synthase activity of the extracts. However, this tRNA contains UC at four positions: 27-28, 31-32, 39-40 and 55-56 (Supplemental Fig. S1). Therefore, we used two mutant versions of this tRNA. In one case, three U's, i.e., at positions 27, 39 and 55 were changed to C, C and A, respectively (referred as Mut-tRNA<sup>Met</sup> in Supplemental Fig. S2B), thus leaving UC only at position 31-32, and in the other case, U31 was also changed to a C (referred as U31C mut). PCR products of two oligonucleotides that overlapped at their 3' ends, were used to prepare transcripts of these two tRNAs. Treatment of the three U's mutant tRNA<sup>Met</sup> (Mut-tRNA<sup>Met</sup>) showed labeled  $\Psi$ p only with the cytoplasmic extracts, but this was absent when the four U's mutant tRNA was used (Supplemental Fig. S2B). This suggested that the  $\Psi$ p observed here is derived from the position 31. Mitochondrial and nuclear extracts did not show any  $\Psi$ p (bottom two panels in

Supplemental Fig. S2B). Apparently our tRNA<sup>Met</sup> transcript is not a substrate for the human mitochondrial Ψ31 synthase activity. Sequence of human mitochondrial tRNA<sup>Met</sup> is very different from the cytoplasmic tRNA<sup>Met</sup> and mammalian mitochondrial tRNA<sup>Met</sup> genes contain G not T at position 31 (Juhling et al. 2009). Ψ31 synthase activity remains nearly the same in the cytoplasmic extracts of the knockdown strains when compared with their activities in the wild type (Supplemental Fig. S2B). Therefore, Ψ55 synthase activities in the cytoplasmic extracts of the knockdown strains are measured relative to their Ψ31 synthase activity as shown in Fig. 2C.

### SUPPLEMENTAL FIGURE LEGENDS

**Supplemental Figure S1.** Sequences of tRNA transcripts used in this study. The original A-U pair at position 1-72 of the tRNA<sup>iMet</sup> was changed to G-C for the ease of transcription. Relevant Ψ modifications observed in native mammalian tRNAs are shown in parentheses. Mutations of residues in tRNA<sup>Ala</sup>, tRNA<sup>iMet</sup>, tRNA<sup>AU-Ala</sup> and tRNA<sup>Met</sup> used in this work are indicated.

**Supplemental Figure S2.** PUS1, PUS2 and tRNA Ψ31 synthase activities of the extracts. (A) [ $\alpha$ -<sup>32</sup>P]UTP-labeled transcripts of tRNA<sup>Phe</sup> were incubated with nuclear (NE) and mitochondrial (ME) extracts of WT and TRUB1, TRUB2, PUS10 knockdown strains of PC3 cells as well as with extracts where all the three proteins were depleted (All 3-KD). They were analyzed as in Fig. 1. Ψ in all cases is derived from positions 27 of the tRNAs. Unrelated luciferase knockdown (siLuc) is a control showing there is no affect in Ψ synthesis due to the transfection itself. Cytoplasmic extract (CE, bottom panel) showed no Ψ27 synthesis. (B) [ $\alpha$ -<sup>32</sup>P]CTP-labeled transcripts of Mut-tRNA<sup>Met</sup> (U27C, U39C and U55A mutations-containing tRNA<sup>Met</sup>) were incubated with cytoplasmic (CE) extracts of WT and TRUB1, TRUB2, PUS10 and luciferase

knockdown strains of PC3 cells as well as with extracts when all the three proteins were depleted (All 3-KD). They were analyzed as in (A). Absence of  $\Psi$  in U31C mutant of this tRNA (WT+U31C) indicates that  $\Psi$  in all cases is derived from positions 31 of these tRNAs. Nuclear and mitochondrial extracts (bottom two panel) showed no  $\Psi$ 31 synthesis.

**Supplemental Figure S3.** Immunoblots of sub-cellular fractions. (A) Purity of nuclear (NE) and total cytoplasmic (TCE) fractions of HEK293T cells transiently transfected with His-tagged human PUS10 clone. Blots were probed with antibodies against lamin A (ab26300, Abcam) and tubulin (ab6046, Abcam), which were used as nuclear and cytoplasmic markers, respectively. (B) Recombinant proteins isolated from nuclear (nh-PUS10) and total cytoplasmic (ch-PUS10) fractions shown in (A) are indeed His-tagged PUS10 as determined by anti-PUS10 (HPA049582, Sigma) and anti-His (2365, Cell Signal Technology) antibodies. (C) Purity of nuclear (NE), cytoplasmic (CE) and mitochondrial (ME) fractions of PC3 cells were determined by anti-lamin A, anti-tubulin and anti-porin (ab15895, Abcam) antibodies as nuclear, cytoplasmic and mitochondrial markers, respectively. (D) Purity of nuclear (NE) and total cytoplasmic (TCE) fractions of mouse liver cells were determined by using anti-lamin A and anti-tubulin antibodies as nuclear and cytoplasmic markers, respectively.

**Supplemental Figure S4.** Determination of protein knock down. (A) Immunoblot analyses of cell lysates of PC3 cells after performing knockdowns (KD) for TRUB1, PUS10 and TRUB2 showed a decreased amount of these proteins in the cells. Lysates of normal PC3 (WT) and siLuc transfected PC3 cells were used as controls. Blots were probed with antibodies against TRUB1 (PA5-58163, Invitrogen), PUS10 (HPA049582, Sigma), TRUB2 (sc-514573, Santa Cruz

Biotechnology) and  $\beta$ -actin (ab8227, Abcam).  $\beta$ -actin was used as the loading control. The blots were normalized with respect to  $\beta$ -actin and a fold change was calculated with respect to the WT signal. The fold changes are indicated below each lane in the blot. (B) qPCR was used to compare the amount of PUS10, TRUB1 and TRUB2 mRNA in PC3 cells after performing knockdowns (KD) for the proteins. WT and siLuc transfected PC3 cells were again used as a control. Results are normalized with respect to HPRT mRNA. Values are the mean  $\pm$  S.E. (n=3).

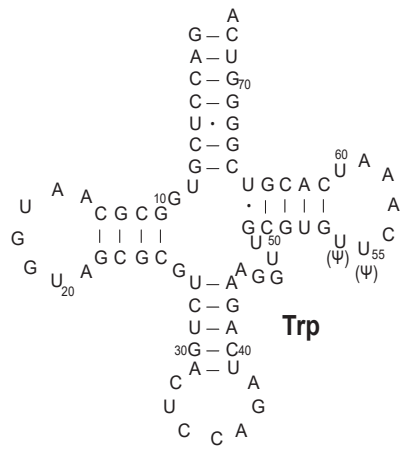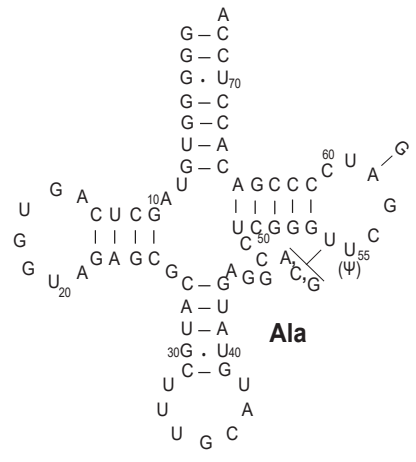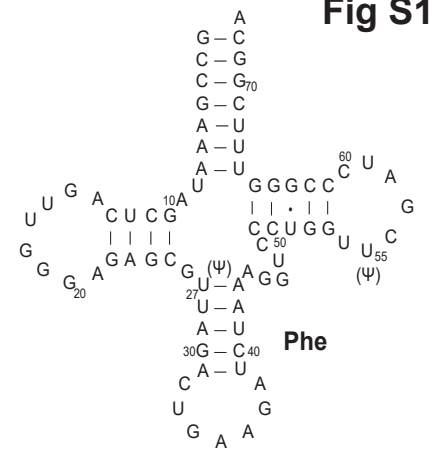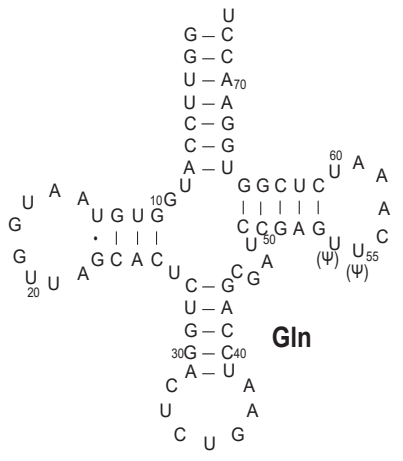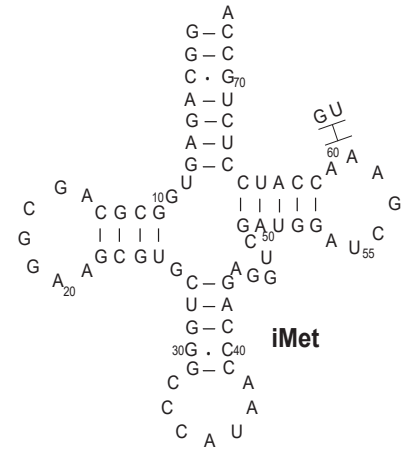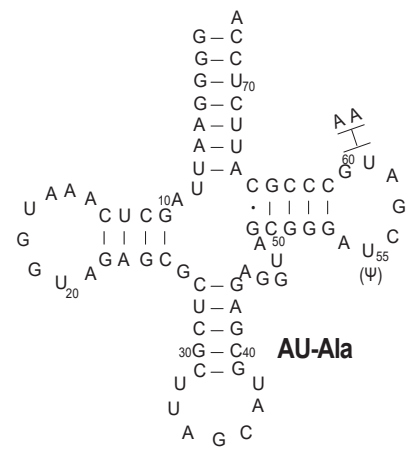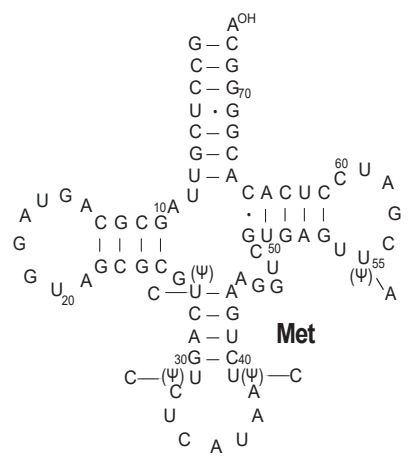

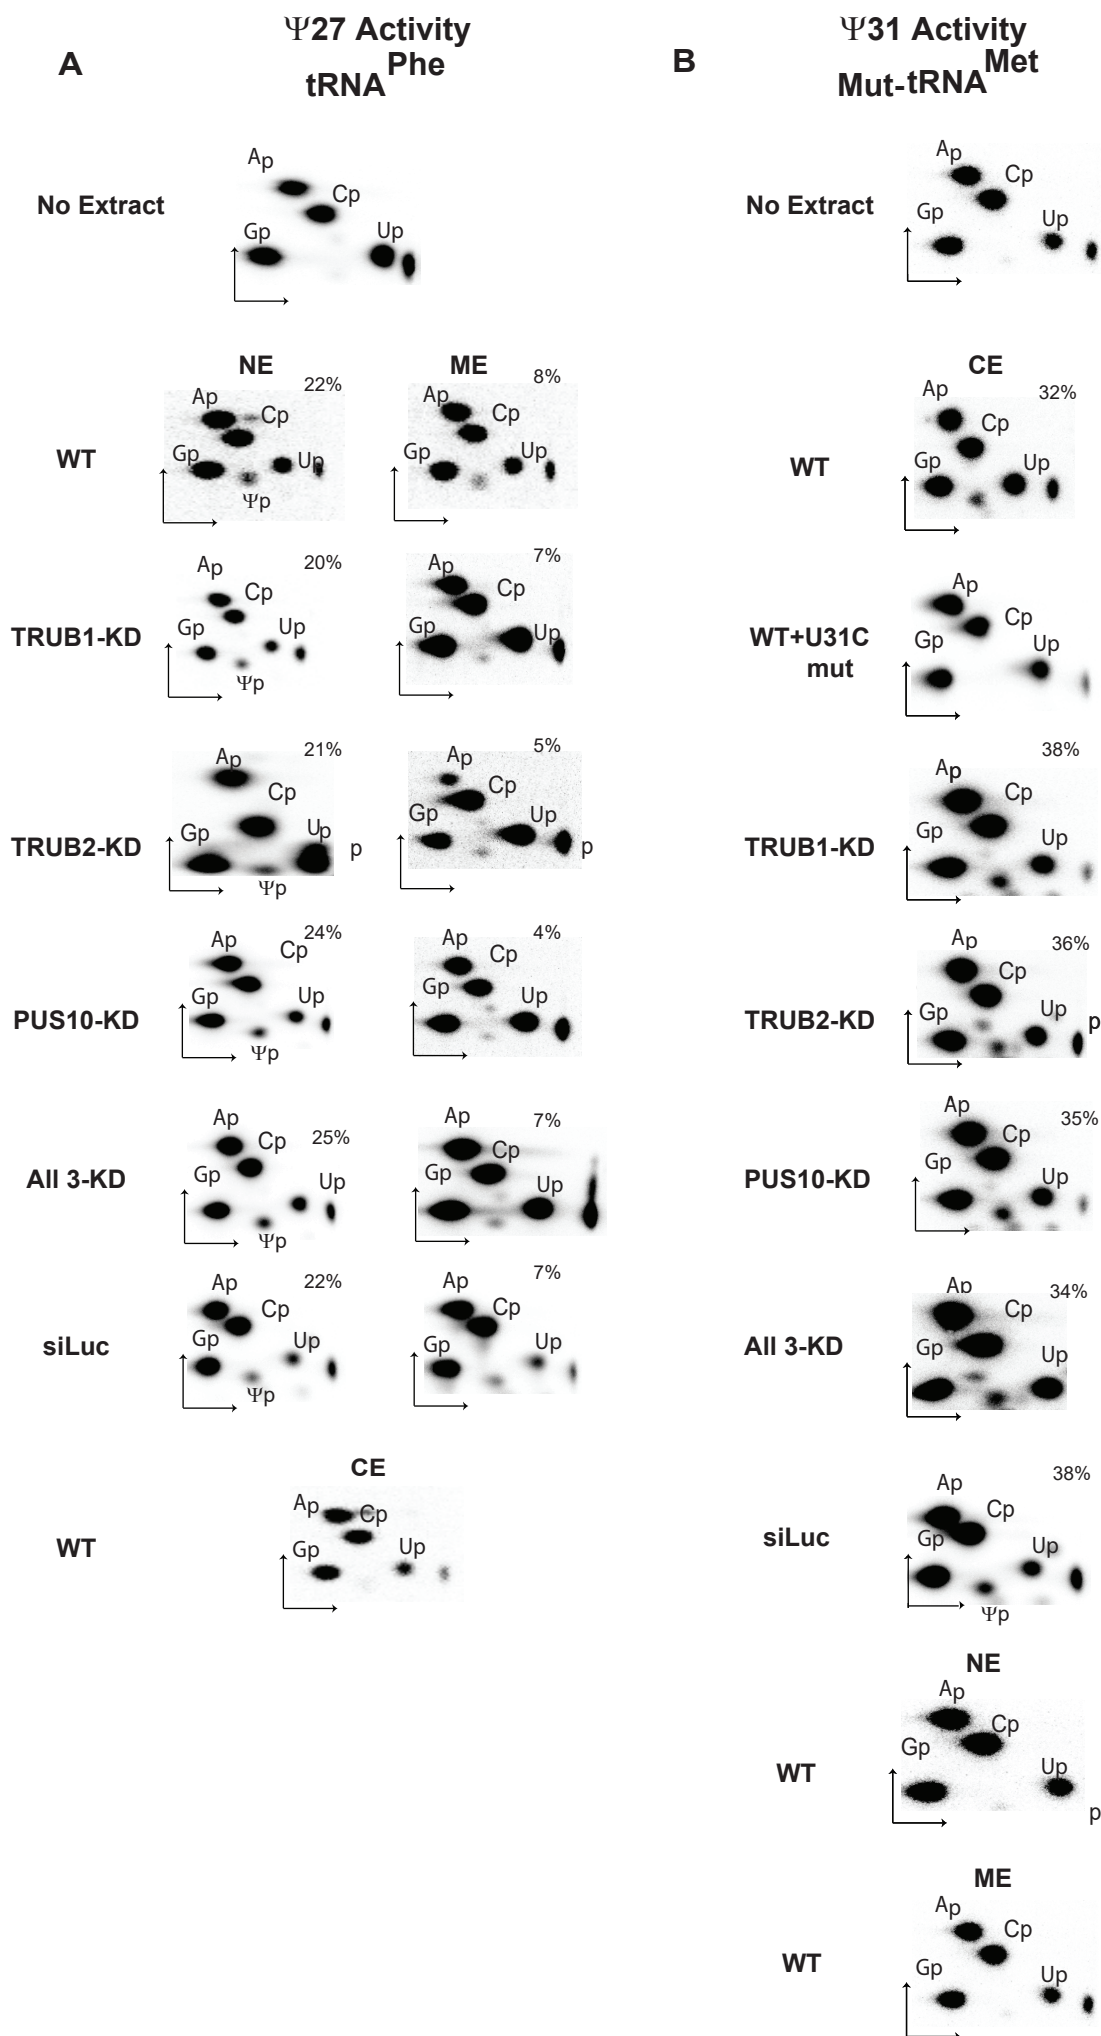

**Figure S3****A**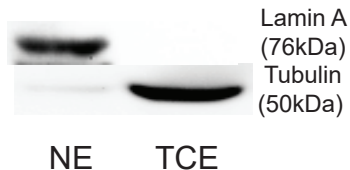**B**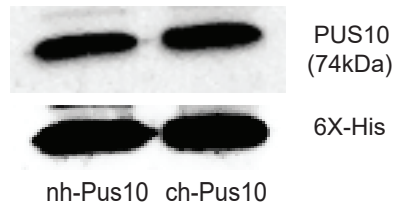**C**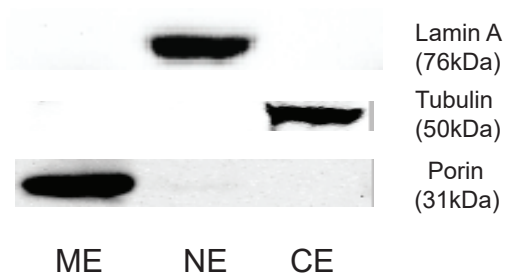**D**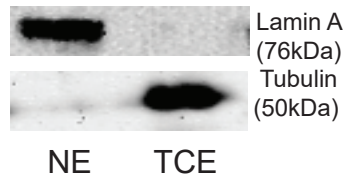



A

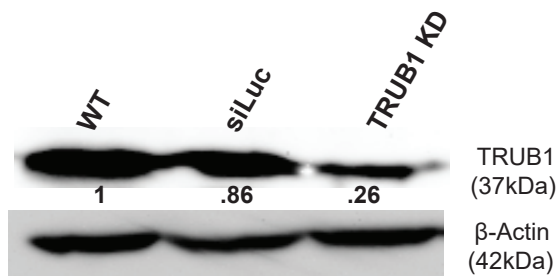

B

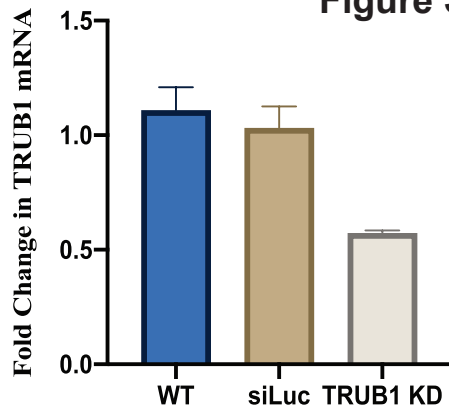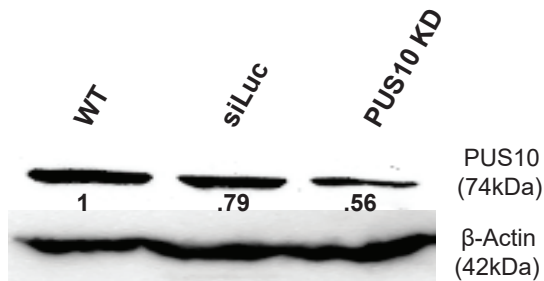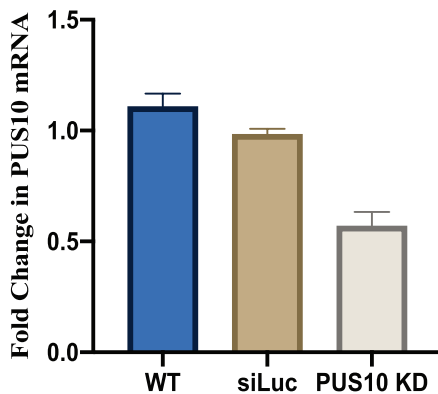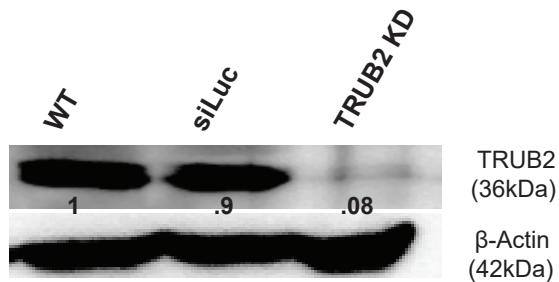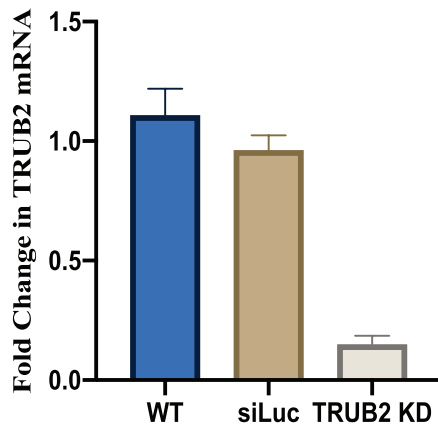

## Supplemental Table 1: p values

| NE              | Fig 2C      |         |         |         |
|-----------------|-------------|---------|---------|---------|
|                 | Trp         |         | Ala     |         |
|                 | p value     | Summary | p value | Summary |
| WT vs siLuc     | >0.9999     | ns      | 0.8126  | ns      |
| WT vs TRUB1 KD  | 0.0049      | **      | 0.0286  | *       |
| WT vs TRUB2 KD  | 0.4062      | ns      | 0.9999  | ns      |
| WT vs PUS10 KD  | 0.3853      | ns      | 0.9221  | ns      |
| WT vs B1+B2+P10 | <0.0001     | ****    | 0.0022  | **      |
| CE              | Trp         |         | Ala     |         |
|                 | p value     | Summary | p value | Summary |
|                 | WT vs siLuc | 0.7423  | ns      | 0.9654  |
| WT vs TRUB1 KD  | 0.9898      | ns      | 0.9996  | ns      |
| WT vs TRUB2 KD  | 0.9998      | ns      | 0.2509  | ns      |
| WT vs PUS10 KD  | <0.0001     | ****    | 0.0474  | *       |
| WT vs B1+B2+P10 | <.0001      | ****    | 0.0002  | ***     |
| ME              | Trp         |         | Ala     |         |
|                 | p value     | Summary | p value | Summary |
|                 | WT vs siLuc | >0.9999 | ns      | 0.9813  |
| WT vs TRUB1 KD  | >0.9999     | ns      | 0.9924  | ns      |
| WT vs TRUB2 KD  | 0.0001      | ***     | 0.0002  | ***     |
| WT vs PUS10 KD  | 0.984       | ns      | >0.9999 | ns      |
| WT vs B1+B2+P10 | 0.0002      | ***     | 0.001   | **      |

| +TRUB1 vs h-PUS10+TRUB1 | Fig 6A  |         |
|-------------------------|---------|---------|
|                         | p value | Summary |
| Trp                     | 0.002   | **      |
| Ala                     | 0.818   | ns      |
| iMet                    | 0.02    | *       |
| AU-Ala                  | >0.9999 | ns      |

|                   | Fig 6C  |         |         |         |
|-------------------|---------|---------|---------|---------|
|                   | Trp     |         | Ala     |         |
|                   | p value | Summary | p value | Summary |
| NE vs ch-PUS10+NE | 0.009   | **      | 0.013   | *       |
| NE vs nh-PUS10+NE | 0.0056  | **      | >0.9999 | ns      |
| CE vs ch-PUS10+CE | 0.1689  | ns      | 0.0409  | *       |
| CE vs nh-PUS10+CE | 0.027   | *       | 0.9999  | ns      |

\*p<0.05, \*\*p<0.01, \*\*\*p<0.001 and \*\*\*\*p<0.0001, ns = not significant.

**Supplemental Table S2: List of oligonucleotides used in this work and their functions**

| <b>Oligonucleotide</b>                                                             | <b>Sequence</b>                                             | <b>Purpose</b>                               |
|------------------------------------------------------------------------------------|-------------------------------------------------------------|----------------------------------------------|
| <b>Oligonucleotides used for primer extensions</b>                                 |                                                             |                                              |
| MUTRP3R                                                                            | TGG TGA CCC CGA CGT                                         | CMCT-primer extension of Trp tRNA            |
| MUGLN3R                                                                            | TGG AGG TCC CAC CGA                                         | CMCT-primer extension of Gln tRNA            |
| MUALA3R                                                                            | TGG AGG TGT CGG GGA                                         | CMCT-primer extension of Ala tRNA            |
| MUPHE3R                                                                            | TGG TGC CGA AAC CCG                                         | CMCT-primer extension of Phe tRNA            |
| MUIMET3R                                                                           | TGG TAG CAG AGG ATG                                         | CMCT-primer extension of iMet tRNA           |
| MUAU-ALA3R                                                                         | TGG TGG AGA ATG CGG                                         | CMCT-primer extension of AU-Ala tRNA         |
| <b>Oligonucleotides used to generate templates for in vitro tRNA transcription</b> |                                                             |                                              |
| T7HUTRP5F                                                                          | TAA TAC GAC TCA CTA<br>TAG GTT CCA TGG TGT<br>AAT GGT TAG C | To generate templates to transcribe Trp tRNA |
| HUTRP-3R                                                                           | TGA CCC CGA CGT GAT<br>TTG AAC                              |                                              |
| T7HUALA5F                                                                          | TAA TAC GAC TCA CTA<br>TAG GGG GTG TAG CTC<br>AGT GG        | To generate templates to transcribe Ala tRNA |

|              |                                                                                                   |                                                    |
|--------------|---------------------------------------------------------------------------------------------------|----------------------------------------------------|
| HUALA-3R     | TGG AGG TGT CGG GGA<br>TCG AAC CCG AGG                                                            |                                                    |
| HUALA-3R2    | TGG AGG TGT CGG GGA<br><u>CCG</u> AAC CCG AGG                                                     | To generate A58G mutation in<br>Ala tRNA           |
| HUALA-3R3    | TGG AGG TGT CGG GGA<br>TCG <u>AGC</u> CCG AGG                                                     | To generate U54C mutation in<br>Ala tRNA           |
| HUALA-3R4    | TGG AGG TGT CGG GGA<br>TCG <u>ACC</u> CCG AGG                                                     | To generate U54G mutation in<br>Ala tRNA           |
| HUALA-3R5    | TGG AGG TGT CGG GGA<br>TCG <u>ATC</u> CCG AGG                                                     | To generate U54A mutation in<br>Ala tRNA           |
| T7HU-iMET5F  | TAA TAC GAC TCA CTA<br>TAG <u>GCA</u> GAG TGG CGC<br>AGC GGA AGC GTG CTG<br>GGC CC                | To generate templates to transcribe<br>iMet tRNA   |
| HU-iMET-3R   | <u>TGG</u> CAG AGG ATG GTT<br>TCG ATC CAT CGA CCT<br>CTG GGT TAT GGG CCC<br>AGC ACG CTT CC        |                                                    |
| HUIMET-3R2   | <u>TGG</u> CAG AGG ATG <u>GCA</u><br>TCG ATC CAT CGA CCT<br>CTG GGT TAT GGG CCC<br>AGC ACG CTT CC | To generate AA59-60UG mutation in<br>iMet tRNA     |
| T7HUAU-ALA5F | TAA TAC GAC TCA CTA<br>TAG GGG AAT TAG CTC<br>AAA TGG TAG AGC GCT<br>CGC TTA G                    | To generate templates to transcribe<br>AU-Ala tRNA |
| HUAU-ALA-3R  | TGG AGA ATG CGG GCA<br>TCG ATC CCG CTA CCT<br>CTC GCA TGC TAA GCG<br>AGC GCT CTA CC               |                                                    |
| HUAU-ALA-3R2 | TGG AGA ATG CGG <u>GTT</u><br>TCG ATC CCG CTA CCT<br>CTC GCA TGC TAA GCG<br>AGC GCT CTA CC        | To generate UG59-60AA mutation in<br>AU-Ala tRNA   |
| T7HUPHE5F    | TAA TAC GAC TCA CTA<br>TAG CCG AAA TAG CTC<br>AGT TGG G                                           | To generate templates to transcribe<br>Phe tRNA    |

|                                                               |                                                                                                                 |                                                                                                                          |
|---------------------------------------------------------------|-----------------------------------------------------------------------------------------------------------------|--------------------------------------------------------------------------------------------------------------------------|
| HUPHE-3R                                                      | TGC CGA AAC CCG GGA<br>TCG AAC                                                                                  |                                                                                                                          |
| T7HUMUT-MET-5F                                                | TAA TAC GAC TCA CTA<br>TAG CCT CGT TAG CGC<br>AGT AGG TAG CGC <u>GCC</u><br>AGT CTC                             | To generate templates to transcribe elongator Met tRNA with U27C,U55A and U39C change                                    |
| HUMUT-MET-3R                                                  | TGC CCC GTG TGA GGA<br>TCG <u>TAC</u> TCA CGA CCT<br>TCA <u>GGT</u> TAT GAG ACT<br><u>GGC</u> GCG CTA CC        |                                                                                                                          |
| HUMUT-MET-3R2                                                 | TGC CCC GTG TGA GGA<br>TCG <u>TAC</u> TCA CGA CCT<br>TCA <u>GGT</u> TAT GAG <u>GCT</u><br><u>GGC</u> GCG CTA CC | To generate U27C,U55A, U39C and U31C mutation in elongator Met tRNA                                                      |
| T7HUGLN5F                                                     | TAA TAC GAC TCA CTA<br>TAG GTT CCA TGG TGT<br>AAT GGT TAG C                                                     | To generate templates to transcribe Gln tRNA                                                                             |
| HUGLN-3R                                                      | AGG TTC CAC CGA GAT<br>TTG AAC TCG                                                                              |                                                                                                                          |
| <b>Oligonucleotides used to generate and check knockdowns</b> |                                                                                                                 |                                                                                                                          |
| siLuc_ss                                                      | GCA CAU AUC GAG GUG<br>AAC ATT                                                                                  | Sense(ss) and Antisense(as) siRNA sequences used for transient knock-down of Luciferase gene which was used as a control |
| siLuc_as                                                      | UGU UCA CCU CGA UAU<br>GUG                                                                                      |                                                                                                                          |
| siTRUB1_ss                                                    | GCA GAA GAC AGC UCC<br>UUU ATT                                                                                  | Sense(ss) and Antisense(as) siRNA sequences used for transient knock-down of TRUB1 gene                                  |
| siTRUB1_as                                                    | UAA AGG AGC UGU CUU<br>CUG CTT                                                                                  |                                                                                                                          |
| siTRUB2_ss                                                    | CCC AGG AGU UUA AGG<br>UUG UTT                                                                                  | Sense(ss) and Antisense(as) siRNA sequences used for transient knock-down of TRUB2 gene                                  |

|                                             |                                        |                                                                            |
|---------------------------------------------|----------------------------------------|----------------------------------------------------------------------------|
| siTRUB2_as                                  | ACA ACC UUA AAC UCC<br>UGG GTT         |                                                                            |
| HUPUS10-F                                   | CTC ACC AAA GGC TGT<br>ATG C           | Primers used to perform qPCR to estimate the amount of PUS10 mRNA          |
| HUPUS10-R                                   | CCA AGG AGT TTG TGG<br>TAG ATT CC      |                                                                            |
| HUTRUB1-F                                   | ACA CAA GAA GAT ATT<br>GAA GGC A       | Primers used to perform qPCR to estimate the amount of TRUB1 mRNA          |
| HUTRUB1-R                                   | CCT CTC TTC ATC AAA<br>GTC GAA A       |                                                                            |
| HUTRUB2-F                                   | GCT GAT AAC TGG CAT<br>CCG ATG C       | Primers used to perform qPCR to estimate the amount of TRUB2 mRNA          |
| HUTRUB2-R                                   | GCA GTG GTC TTT AGT<br>TCC AGG C       |                                                                            |
| HUHPRT-F                                    | TGACACTGGCAAAACAA<br>GCA               | Primers used to perform qPCR to estimate the amount of HPRT mRNA           |
| HUHPRT-R                                    | GGTCCTTTTCACCAGCAA<br>GCT              |                                                                            |
| <b>Oligonucleotides used to clone genes</b> |                                        |                                                                            |
| HUTRUB1-F2                                  | CCT GCC ATG GCC GCT<br>TCT GAG GCG GCG | Forward primer to clone TruB1 gene in <i>Nco</i> I (CCATGG) site of pET28a |

|            |                                                                                          |                                                                                                                                                                        |
|------------|------------------------------------------------------------------------------------------|------------------------------------------------------------------------------------------------------------------------------------------------------------------------|
| HUTRUB1-R2 | CTG CTC GAG GCT GCC<br>GCG CGG CAC CAG ACA<br>CGT CTT AAT TAC ATC<br>ATC                 | Reverse primer to clone TruB1 gene,<br>has an <i>Xho</i> I (CTCGAG) site and<br>sequence complementary to codons<br>of thrombin cut site (GCT GCC GCG<br>CGG CAC CAG)  |
| HUTRUB2-F2 | CGC TCT AGA AAT TTT<br>GTT TAA CTT TAA GAA<br>GGA GAT ATA CCA TGG<br>GGT CTG CTG GCT TGT | Forward primer to clone TruB2 gene<br>in <i>Xba</i> I (TCTAGA) site of pET28a                                                                                          |
| HUTRUB2-R2 | CTG CTC GAG GCT GCC<br>GCG CGG CAC CAG CTG<br>CCC CGC ACC CCT C                          | Reverse primer to clone TruB2 gene,<br>has an <i>Xho</i> I (CTCGAG) site and<br>sequence complementary to codons<br>of thrombin cut site (GCT GCC GCG<br>CGG CAC CAG). |
